# Supplementary material for: Managing pain-and-distress during infant vaccination: An integrative literature review
Source: Research Square preprint supplement (doi:10.21203/rs.3.rs-6506614/v1), 2025-11-30
Supplement: Supplementary file 1 [file 0d29e5e964cd118c06c955af.docx]

**Table 3: Data analysis and Synthesis**

| **Themes (n=3)** | **Category and intervention** | **Intervention frequency n= 28 (100%)** | **References** | **Age category** | **Evidence of benefit** |
| --- | --- | --- | --- | --- | --- |
| **Theme 1** | **Non-Pharmacological interventions** | **18 (64%)** |  | **1 - 12m** | **High evidence of benefit** |
| **Category 1** | ***Physical interventions*** | **(n=10)** |  | **1 - 12m** | **High evidence of benefit** |
|  | Breastfeeding | (n=5) | Bhurtel *et al.,* 2020 (23) | 1 -12m | High evidence of benefit |
| Erkul & Efe *et al.,* 2017 (86) | 2m | Moderate evidence of benefit |
| Goswami *et al.,* 2014 (38) | ≤3m | High evidence of benefit |
| Kavthekar *et al.,* 2016 (37) | <2m | High evidence of benefit |
| Viggiano *et al.,* 2021 (42) | 2 - 12m | High evidence of benefit |
| Formula feeding | (n=2) | Bos-Veneman *et al.,* 2018 (41) | 1 - 2.5m | High evidence of benefit |
| Viggiano *et al.,* 2021 (42) | 2 - 12m | High evidence of benefit |
| Parental behaviour | (n=1) | Badovinac *et al.,* 2018 (48) | 2, 6 and 12m | No evidence of benefit |
| Position | (n=1) | Yin *et al.,* 2017 (52) | 1.5m-4m | Moderate evidence of benefit |
| Rocking | (n=1) | Yadav *et al.,* 2022 (54) | <6m | High evidence of benefit |
| **Category 2** | ***Sensory stimulation*** | **(n=5)** |  | **1 - 7m** | **High evidence of benefit** |
|  | Flick application | (n=1) | Ciftci *et al.,* 2016 (59) | 1m | High evidence of benefit |
| Foot reflexology | (n=1) | Shahroudi *et al.,* 2023 (58) | 2 - 7m | High evidence of benefit |
| Lavender oil inhalation | (n=1) | Vaziri *et al.,* 2019 (62) | 2 - 4m | High evidence of benefit |
| Manual pressure | (n=1) | Unesi *et al.,* 2019 (60) | 4m | High evidence of benefit |
| Temperature (Heat/cold) | (n=1) | Güngör T & Özlem *et al.,* 2021 (57) | 2 - 6m | High evidence of benefit |
| **Category 3** | ***Distraction*** | **(n=2)** |  | **2 - 6m** | **High evidence of benefit** |
|  | Musical snow globe | (n=1) | Akkoc & Ayyıldız, 2021 (66) | 2 and 6m | High evidence of benefit |
| Rattle | (n=1) | Basiri -Moghadam *et al.,* 2014 (87) | 4 - 6m | High evidence of benefit |
| **Category 4** | ***Procedural*** | **(n=1)** |  | **≤4m** | **High evidence of benefit** |
|  | Order of vaccine | (n=1) | Kumar *et al.,* 2016 (73) | ≤4m | High evidence of benefit |
| **Theme 2** | **Pharmacological interventions** | **n=4 (14%)** |  | **1 - 6m** | **High evidence of benefit** |
| **Category 5** | ***Oral sweet tasting solutions*** | **(n=2)** |  | **≤3m** | **High evidence of benefit** |
|  | Dextrose 25% | (n=1) | Goswami *et al.,* 2014 (38) | ≤3m | High evidence of benefit |
| Sucrose 24% | (n=1) | Kavthekar *et al.,* 2016 (37) | ‹2m | High evidence of benefit |
| **Category 6** | ***Local anaesthesia*** | **(n=2)** |  | **3 - 6m** | **High evidence of benefit** |
|  | EMLA | (n=2) | Basiri -Moghadam *et al.,* 2014 (87) | 4-6m | High evidence of benefit |
| Duse *et al.,* 2016 (80) | 3m | High evidence of benefit |
| **Theme 3** | **Combined interventions** | **n=6 (21%)** |  | **1 - 12m** | **Moderate evidence of benefit** |
| **Category 7** | ***Non-pharmacological*** | **(n=2)** |  | **6m** | **No evidence of benefit** |
|  | Active treatment video | (n=2) | Gennis *et al.,* 2018 (84) | 6m | No evidence of benefit |
| Riddell *et al.,* 2018 (70) | 6m | No evidence of benefit |
| **Category 8** | ***Pharmacological and non-pharmacological combination*** | **(n=4)** |  | **2-12m** | **Moderate evidence of benefit** |
|  | EMLA and breastfeeding | (n=2) | Gupta *et al.,* 2013 (39) | ≤3m | Moderate evidence of benefit |
| Gupta *et al.,* 2017 (83) | ≤3m | Moderate evidence of benefit |
| Vapocoolant and breastfeeding | (n=1) | Gupta *et al.,* 2017 (83) | ≤3m | Moderate evidence of benefit |
| Active treatment video | (n=1) | Taddio *et al.,* 2017 (82) | 2-12m | No evidence of benefit |
| Active treatment video and sucrose | No evidence of benefit |
| Active treatment video, sucrose and lidocaine | High evidence of benefit |

High evidence of benefit ~~High evidence of benefit~~ (p=≤0.01 - 0.001); Moderate evidence of benefit ~~Moderately effective~~ (p=<0.05); No evidence of benefit (p=>0.05 ns).

Note: Counts reflect the number of intervention themes not the unique studies. Some studies contributed more than one intervention.
