# Supplementary material for: Managing pain-and-distress during infant vaccination: An integrative literature review
Source: Research Square preprint supplement (doi:10.21203/rs.3.rs-6506614/v1), 2025-11-30
Supplement: Supplementary file 2 [file 54b01b8c81a6b44676ea4632.docx]

| **Step 3 CA of sampled documents** | | | | |
| --- | --- | --- | --- | --- |
| Citation | JBI CA tool | CASP CA tool | Grade of evidence (JBI) | Level of evidence (JBI) |
| 1. Akkoc. 2021. "The Effect of Snow Globe Used in Infancy Vaccination Applications on Pain Level.". *https://clinicaltrials.gov/show/NCT04772430* | Include | Include | Grade A | Level 1 RCT |
| 1. Badovinac, S., Gennis, H., Riddell, R.P., Garfield, H. & Greenberg, S. 2018. Understanding the Relative Contributions of Sensitive and Insensitive Parent Behaviors on Infant Vaccination Pain. *CHILDREN-BASEL*, 5(6), 80. 10.3390/children5060080 | Include | Include | Grade A | Level 3 Cohort |
| 1. Basiri-Moghadam, M., Kianmehr, M., Pasban-Noghabi, S. & Basiri-Moghadam, K. 2014. Comparison of EMLA cream with rattles on reducing immunization pain in four months infants. *The Journal of the Pakistan Medical Association*, 64(8):874‐878 | Include | Include | Grade A | Level 1 RCT |
| 1. Bhurtel, R., Yadav, U., Chaudhary, R., Shah, S., Poudel, P., Pokhrel, R.P. & Sharma, S. 2020. Effect of breastfeeding on relieving pain during immunization in infant. *Kathmandu University Medical Journal*, 18(72):376-380 | Include | Include | Grade B | Level 1 RCT |
| 1. Bos-Veneman, N.G.P., Otter, M. & Reijneveld, S.A. 2018. Using feeding to reduce pain during vaccination of formula-fed infants: a randomised controlled trial. *Archives of Disease in Childhood*, 103(12):1132-1137 | Include | Include | Grade A | Level 1 RCT |
| 1. Ciftci, E.K., Ozdemir, F.K. & Aydin, D. 2016. Effect of flick application on pain level and duration of crying during infant vaccination. *ITALIAN JOURNAL OF PEDIATRICS*, 42, 8. 10.1186/s13052-016-0218-y | Include | Include | Grade A | Level 1 RCT |
| 1. Duse, O.B., Sporrong, Y., Skoglund, K. & Bartocci, M. 2022. Emla®-cream as pain relief during pneumococcal vaccination. *Scandinavian journal of pain*, 12(1):123‐124. 10.1016/j.sjpain.2016.05.021 | Include | Include | Grade A | Level 1 RCT |
| 1. Erkul, M. & Efe, E. 2017. Efficacy of breastfeeding on babies' pain during vaccinations. *Breastfeeding Medicine*, 12(2):110-115. 10.1089/bfm.2016.0141 | Include | Include | Grade A | Level 1 RCT |
| 1. Gennis, H., Pillai Riddell, R., O'Neill, M.C., Katz, J., Taddio, A., Garfield, H. & Greenberg, S. 2018. Parental psychological distress moderates the impact of a video intervention to help parents manage young child vaccination pain. *Journal of Pediatric Psychology*, 43(10):1170-1178. 10.1093/jpepsy/jsy058 | Include | Include | Grade A | Level 1 RCT |
| 1. Goswami, G., Upadhyay, A., Gupta, N.K., Chaudhry, R., Chawla, D. & Sreenivas, V. 2014. A clinical trial to study the effect of breastfeeding and 25% oral dextrose for pain relief during immunization of infants. *https://trialsearch.who.int/Trial2.aspx?TrialID=CTRI/2014/07/004724* | Include | Include | Grade A | Level 1 RCT |
| 1. Gosai. 2018. Efficacy of local anaesthetic for reducing pain during vaccination. [*https://trialsearch.who.int/Trial2.aspx?TrialID=CTRI/2018/04/013478*](https://trialsearch.who.int/Trial2.aspx?TrialID=CTRI/2018/04/013478) | Exclude | Exclude | Grade B | Level 1 RCT |
| 1. Güngör, T. & Oztürk, S.O. 2021. Analysis of two non-pharmacological pain management methods for vaccine injection pain in infants: A randomized controlled trial. *Pain*, 33(1):15-22. 10.14744/agri.2020.54289 | Include | Include | Grade B | Level 1 RCT |
| 1. Gupta, N., Upadhyay, A., Agarwal, A., Goswami, G., Kumar, J. & Sreenivas, V. 2013. Randomized controlled trial of topical EMLA and breastfeeding for reducing pain during wDPT vaccination. *European Journal of Pediatrics*, 172(11):1527-1533. 10.1007/s00431-013-2076-6 | Include | Include | Grade A | Level 1 RCT |
| 1. Gupta, N., Upadhyay, A., Dwivedi, A., Agarwal, A., Jaiswal, V. & Singh, A. 2017. Randomized controlled trial of topical EMLA and vapocoolant spray for reducing pain during wDPT vaccination. *World Journal of Pediatrics*, 13(3):236-241 | Include | Include | Grade A | Level 1 RCT |
| 1. Kavthekar, S., Patil, R., Kurane, A. & Bharati, H. 2016. Comparison of analgesic effect of 24% sucrose and breast milk in healthy infants less than 2 months of age. *International Journal of Contemporary Pediatrics*, 3(4):1375-1379. 10.18203/2349-3291.ijcp20163681 | Include | Include | Grade A | Level 1 RCT |
| 1. Kumar, M., Upadhyay, A., Singh, J., Chhabra, M., Singh, A., Gupta, N.K., ... Yadav, C.P. 2016. Effect of change in sequence of administration of DTwP and Hepatitis B vaccines on perception of pain in infants: A randomized control trial. *Vaccine*, 34(15):1816-1822. 10.1016/j.vaccine.2016.02.031 | Include | Include | Grade A | Level 1 RCT |
| 1. Riddell, R.P., O'Neill, M.C., Campbell, L., Taddio, A., Greenberg, S. & Garfield, H. 2018. Featured ArticThe ABCDs of Pain Management: a Double-Blind Randomized Controlled Trial Examining the Impact of a Brief Educational Video on Infants' and Toddlers' Pain Scores and Parent Soothing Behavior. *Journal of pediatric psychology*, 43(3):224‐233. 10.1093/jpepsy/jsx122 | Include | Include | Grade A | Level 1 RCT |
| 1. Shahroudi. 2023. Survey the Effect of Foot Reflexology on Physiological Indices, Pain Level and Crying of Infants under Vaccination. *https://trialsearch.who.int/Trial2.aspx?TrialID=IRCT20130412012990N10* | Include | Include | Grade A | Level 1 RCT |
| 1. Taddio, A., Pillai, R.R., Ipp, M., Moss, S., Baker, S., Tolkin, J., ... Stephens, D. 2017. Relative effectiveness of additive pain interventions during vaccination in infants. *CMAJ*, 189(6):E227-E234. 10.1503/cmaj.160542 | Include | Include | Grade A | Level 1 RCT |
| 1. Unesi, Z., Sajed, A. & Sharifzadeh, G.R. 2019. The Effects of Manual Pressure on the Injection Site on Vaccination Pain Among Infants: A Two-Group Clinical Trial. Modern Care Journal, 16(4):e95705. 10.5812/modernc.95705 | Include | Include | Grade A | Level 1 RCT |
| 1. Vaziri, F., khosropoor, M., Hidari, M., Pourahmad, S., Morshed Behbahani, B. & Saki, F. 2019. The Effect of Aromatherapy by Lavender Oil on Infant Vaccination Pain: a Double Blind Randomized Controlled Trial. *Journal of Caring Science*, 8(1):17-21. 10.15171/jcs.2019.003 | Include | Include | Grade A | Level 1 RCT |
| 1. Viggiano C, Occhinegro A, Siano MA, Mandato C, Adinolfi M, Nardacci A. et al. Analgesic effects of breast-and formula feeding during routine childhood immunizations up to 1 year of age. Pediatric Research. 2021;89(5):1179-84 | Include | Include | Grade A | Level 3 Cohort |
| 1. Yadav, J.P., Agrawal, A. & Sawant, V.D. 2022. Effect of facilitated rocking movement in reducing vaccination-induced pain in young infants: a randomized control trial. *Bulletin of the National Research Centre*, 46(1) | Include | Include | Grade B | Level 1 RCT |
| 1. Yin, H.-C., Cheng, S.-W., Yang, C.-Y., Chiu, Y.-W. & Weng, Y.-H. 2017. Comparative survey of holding positions for reducing vaccination pain in young infants. *Pain Research & Management*, 2017, 10.1155/2017/3273171 | Include | Include | Grade A | Level 3 Cohort |
