# Supplementary material for: Managing pain-and-distress during infant vaccination: An integrative literature review
Source: Research Square preprint supplement (doi:10.21203/rs.3.rs-6506614/v1), 2025-11-30
Supplement: Supplementary file 3 [file 8f7b1645459fb8c3056bb352.docx]

**Additional File 4: Search Strings**

| **Search date** | Database | Search# | Search string |
| --- | --- | --- | --- |
| **05-Mar-23** | EBSCOhost including: Academic Search Premier, AHFS Consumer Medication Information, CINAHL, E-Journals, Health Source - Consumer Ed, Health Source - Nursing Academic Ed, MasterFile Premier, PsycARTICLES, PsycINFO and SocINDEX | 1.1 | TI(pain or distress) AND AB(infant* or baby*) AND TI(vaccination* or immunization* OR immunisation) |
| **06-Mar-23** | PubMed | 1.2 | ((((pain[Title] OR discomfort[Title/Abstract]) OR (distress[Title/Abstract] OR stress[Title/Abstract] OR anxiety[Title/Abstract])) AND (manage*[Title/Abstract] OR strategy*[Title/Abstract] OR treatment*[Title/Abstract] OR method*[Title/Abstract] OR guideline*[Title/Abstract] OR relief*[Title/Abstract] OR intervention*[Title/Abstract])) AND (infant*[Title/Abstract] OR child*[Title/Abstract] OR infancy[Title/Abstract] OR one year[Title/Abstract] OR baby[Title/Abstract])) AND (vaccination*[Title] OR immunization*[Title] OR immunisation*[Title]) |
| **05-Mar-23** | Scopus | 1.3 | ( TITLE ( pain OR discomfort ) OR TITLE-ABS-KEY ( distress OR stress OR anxiety ) AND TITLE-ABS-KEY ( manage* OR strategy* OR treatment* OR method* OR guideline* OR relief* OR intervention* ) AND TITLE-ABS-KEY ( infant* OR child* OR infancy OR one AND year OR baby* ) AND TITLE ( vaccination* OR immunization* OR immunisation* ) ) AND NOT ( covid ) AND ( LIMIT-TO ( PUBYEAR , 2013 ) OR LIMIT-TO ( PUBYEAR , 2014 ) OR LIMIT-TO ( PUBYEAR , 2015 ) OR LIMIT-TO ( PUBYEAR , 2016 ) OR LIMIT-TO ( PUBYEAR , 2017 ) OR LIMIT-TO ( PUBYEAR , 2018 ) OR LIMIT-TO ( PUBYEAR , 2019 ) OR LIMIT-TO ( PUBYEAR , 2020 ) OR LIMIT-TO ( PUBYEAR , 2021 ) OR LIMIT-TO ( PUBYEAR , 2022 ) OR LIMIT-TO ( PUBYEAR , 2023 ) ) AND ( LIMIT-TO ( LANGUAGE , "English" ) ) |
| **24-Mar-23** | Web of Science | 1.4 | (((((TI=(pain or discomfort)) OR AB=(distress or stress or anxiety)) AND AB=(manage* or strategy* or treatment* or method* or guideline* or relief* or intervention*)) AND TI=(infant* or child* or infancy or one year or baby*)) AND TI=(vaccination* or immunization* or immunisation*)) |
| **24-Mar-23** | Cochrane: Trials | 1.5 | pain or distress in Title Abstract Keyword AND intervention or management or treatment in Abstract AND infant in Abstract AND vaccination or immunization or immunisation in Abstract - with Publication Year from 2013 to 2023, with Cochrane Library publication date Between 2013 - 2023 |
| **24-Mar-23** | Cochrane: reviews | 1.6 | pain or distress in Title Abstract Keyword AND intervention or management or treatment in Abstract AND infant in Abstract AND vaccination or immunization or immunisation in Abstract - with Cochrane Library publication date Between Jan 2013 and Mar 2023, in Cochrane Reviews, Cochrane Protocols, Clinical Answers, Editorials, Special Collections (Word variations have been searched) |
| **04-May-23** | African Journal | 1.8 | (pain or distress) AND (infant* or baby*) AND (vaccination* or immunization* OR immunisation) ANYwhere (FIELD) |
| **04-May-23** | ISAP | 1.9 | (pain or distress) AND (infant* or baby*) AND (vaccination* or immunization* OR immunisation) all fields |
| **Approx. 29-Jul-24** | Reference Lists manual search | 2.1 | Manual search for relevant document titles containing the key words: Pain, Distress, Management, Infant, Vaccination, from the primary search after full text screening |
| **Approx. 29-Jul-24** | Grey literature manual search | 2.2 | Grey literature website: [https://greymatters.cadth.ca/list?p=1&ps=20&sort=title_sort%20asc&topic_facet=clinical%20practice%20guidelines% 20000000%](https://greymatters.cadth.ca/list?p=1&ps=20&sort=title_sort%20asc&topic_facet=clinical%20practice%20guidelines%25%2020000000%25)7CClinical%20Practice%20Guideline |
| **Approx. 29-Jul-24** | Endnote manual search | 2.3 | All references with 'pain' and screened through T&A and FT |
