# Supplementary material for: Managing pain-and-distress during infant vaccination: An integrative literature review
Source: Research Square preprint supplement (doi:10.21203/rs.3.rs-6506614/v1), 2025-11-30
Supplement: Supplementary file 4 [file 9845cf665ffb6997732d0f83.docx]

**Table 1: Key characteristics extracted**

|  | **Author** | **Context characteristics** | **Study design** | **Interventions (themes)** | **Outcome measures** | **Protocol and vaccines** | **Population/s and age category** |
| --- | --- | --- | --- | --- | --- | --- | --- |
| 1 | Akkoc & Ayyıldız, 2021 (66) | Turkey – UMIC; Family Health Centre | RCT | •Musical snow globe •Control | Time of measurement: During injection  FLACC, TCT, HR and SPO2 | Vaccines: Not reported   - Object with visual and audio played before, during and throughout the vaccination - Control: no intervention | Infants: 2m and 6m |
| 2 | Badovinac *et al.,* 2018 (48) | Canada – HIC; Paediatric Clinics | Cohort, observational data | - Emotional availability of parents - Parent behaviours (proximal soothing- physical comfort and rocking) - Distress-Promoting behaviour | Time of measurement: During and after injection  MBPS  Proximal soothing, Emotional availability and Distress-promoting behaviour | Vaccines: Not reported  Observed soothing behaviour from entering examination room up to five minutes after the vaccination | Infants: 2m, 6m, 12m |
| 3 | Basiri-Moghadam *et al.,* 2014 (87) | Iran – UMIC; Clinic, University | RCT, single blind | •EMLA •Rattle •Control | Time of measurement: During injection and 15s after  Modified scale of pain behaviour | Vaccines: Hep B  •EMLA: 1hr before injection •Rattle: 30s before, during and 15s after •Control: no intervention | Infants: 4-6m |
| 4 | Bhurtel *et al.,* 2020 (23) | Nepal – LMIC; Immunisation Clinic, Tertiary Level Hospital | Experimental study | • Breastfeeding (BF) • Control | Time of measurement: After vaccination  MBPS and TCT | Vaccines: DPT-HepB-HiB  •BF: 5–10min before •Control: may BF | Infants: ≤5m |
| 5 | Bos-Veneman *et al.,* 2018 (41) | Netherlands – HIC; Well-Baby Clinics, Municipal Health Services Organisation | RCT | •Formula feeding •Control | Time of measurement: At 1st and 2nd injection  NIPS, FLACC and TCT | Vaccines: dtap-IPV-HepB-Hib, PCV   - Before, during and after when infant drinking silently and at ease and swallowing movements were visible for 2min - Control: not allowed to have anything in their mouths | Infants: 1-2.5m |
| 6 | Ciftci *et al.*, 2016 (59) | Turkey – UMIC; Family Health Centre | RCT | •Flick application •Control | Time of measurement: During and after  NIPS and TCT | Vaccines: Hep B  •Experimental group: flicked once at the vaccination area (vastus lateralis) prior vaccination •Control group: standard procedure | Infants: 1m |
| 7 | Duse *et al.,* 2022 (80) | Sweden – HIC; Child Welfare Centres | RCT | •EMLA cream •Placebo | Time of measurement: 45 seconds both pre- and post- vaccination  FLACC, HR, O2, TCT, LTC | Vaccines: PCV13  Both groups:  •Application time: 1 hr before injection, area: 3.5cm, occlusive dressing | Infants: 3m |
| 8 | Erkul & Efe, 2017 (86) | Turkey – UMIC; Family Health Centre | RCT | •Breastfeeding (BF) •Control | Time of measurement: for a total duration of 5 min  NIPS, HR, SPO2,  TCT | Vaccines: Wdtp and PCV  •BF: 5min before, during, after •Control: no BF but, allowed to hold, talk, or rock the baby after the procedure in both groups | Infants: Median 8w |
| 9 | Gennis *et al.,* 2018 (84) | Canada – HIC; Paediatric Clinics | RCT, double-blind,  secondary post hoc analyses | •Active treatment video •Control video | Time of measurement: Not specified  MBPS, Parent worry and  MAISD | Vaccines: Not reported   - Treatment video ABCD’s before - Control video also in ABCD format before | Infants: 6m and;  Parents |
| 10 | Goswami *et al.*, 2014 (38) | India - LMIC; Immunisation Clinic, Medical College | RCT placebo | •Breastfeeding •25% dextrose solution •Placebo | Time of measurement:  Immediately after, after 1 min and 3 min  MFCS, TCT, LTC | Vaccines: DPT  •BF: 2min before •Dextrose 25%: 2ml, 2min before •Placebo: 2 ml distilled water 2min before | Infants: ≤3m |
| 11 | Güngör & Özlem, 2021 (57) | Turkey – UMIC; Family Health Centres | RCT | •Heat application •Cold application •Control group | Time of measurement: Not specified  FLACC | Vaccines: PCV   - Heat and cold applications (injection site) immediately before, no direct skin contact, for 2 minutes. - Cold thermogel compresses freezer.  Heat thermogel compresses boiled hot water for 15 minutes before. - Control: no intervention before | Infants: 2–6m and;  Parents |
| 12 | Gupta *et al.,* 2013 (39) | India – LMIC; Immunisation Clinic, Medical College | RCT placebo | •EMLA and BF (EB) •EMLA and water (EW) •Placebo: Water and Vaseline (PCW) | Time of measurement: Not specified  MFCS, TCT, LTC | Vaccines: wDPT  • EMLA: thigh, 1hr before, 10cm, occlusive dressing • BF: Intervention 2 min before and throughout procedure • Water: 2min before | Infants: ≤3m |
| 13 | Gupta *et al.,* 2017 (83) | India – LMIC; Immunisation Clinic, Medical College | RCT Double blind | •EMLA and BF •Vapocoolant and BF •Control: BF | Time of measurement: Not specified  MFCS, NIPS, TCT,  LTC | Vaccines: Wdpt  • EMLA 1hr before, thigh, occlusive dressing and BF 2min before and throughout procedure • Vapocoolant: 12cm from skin, 2s spray, 10s evaporation, 20s wait before injection and BF 2min before and throughout procedure •BF: 2min before and throughout procedure | Infants: ≤3m |
| 14 | Kavthekar *et al.,* 2016 (37) | India – LMIC; Immunisation Clinic, Medical College | RCT, double blind, placebo | •Sterile water (placebo) •24% sucrose •BF | Time of measurement: Within the first 3 min  MFCS, HR, TCT, LTC | Vaccines: DPT   - Placebo 2 ml sterile water 2 minutes before - Sucrose 2 ml, 2 minutes before - BF, 2 minutes before | Infants: <2m |
| 15 | Kumar *et al.,* 2016 (73) | India – LMIC; Immunisation Clinic, Medical College | RCT, parallel | •dtwp vaccine first, followed by Hep B  •Hep B vaccine first, followed by dtwp | Time of measurement: Before, after, 30 sec after applied to both injections  MFCS, NIPS, Heart rate, SpO2, TCT | Vaccines: Hep B and dtwp   - Dtwp vaccine first (DF group) or the - Hep B vaccine first (HF group), one minute after, the second vaccine was administered on opposite thigh | Infants: ≤4m |
| 16 | Riddell *et al.,* 2018 (70) | Canada – HIC; Clinics | RCT, double-blind, placebo, parallel-group study | •Active treatment video  •Placebo video | Time of measurement: Three intervals pain reactivity and regulation  MBPS | Vaccines: Not reported   - Active treatment video 5 min - Placebo video: neutral information | Infants: 6m and;  Parents |
| 17 | Shahroudi *et al.,* 2023 (58) | Iran – UMIC; Comprehensive Health Centre | RCT, double-blind | •Foot reflexology massage •Neutral point massage (sham group)  •Control | Time of measurement: One minute before and at injection time  FLACC | Vaccines: PCV   - Foot reflexology: 15 min massage for each foot in areas related to the vaccine site, foot held in researchers left hand and thumb of his right hand. - Sham: massage in a neutral point - Control group: no intervention | Infants: 2-7m |
| 18 | Taddio *et al.,* 2017 (82) | Canada – HIC; Paediatric Outpatient Clinics and Physician Practices | RCT double-blind, longitudinal multicentre, add-on | - Placebo group - Video group - Video + sucrose - Video + sucrose + cream | Time of measurement: During injection, recovery  Observer MBPS  Physician NRS and MBPS (intragroup)  Parent NRS time-group interaction/satisfaction (5-point Likert scale) | Vaccines: 2 and 4m: DPT-HepB-HiB, PCV,  6m: DPT-HepB-HiB  12m: MCV C, MMR or MCV C, PCV or MCV C, MMR, PCV  Each group's kit contained:  1. Study cream liposomal lidocaine 4%/placebo cream, occlusive dressing for 20 min)  2. Sucrose 24%/placebo suspension), 2ml, 1-2 min before  3. Video (5 min active/placebo video)  Pain measured: Before, after (15 seconds), Recovery = first 15 seconds starting 1 minute after vaccine injection | Infants: 2-12m |
| 19 | Unesi *et al.,* 2019 (60) | Iran – UMIC; Primary Healthcare Centre | Clinical trial, two-group | •Intervention group manual pressure  •Control group no manual pressure | Time of measurement: Not specified  FLACC (T < C)  TCT (T < C) | Vaccines: DPT-HepB-HiB   - Intervention: manual pressure, with thumb on the injection site for ten seconds before vaccination - Control: no manual pressure | Infants: 4m |
| 20 | Vaziri *et al.,* 2019 (62) | Iran – UMIC; Health Centre, University of Medical Sciences | Clinical trial | •Lavender oil inhalation •Placebo | Time of measurement: 1 min before, 30 sec and 5 min after  NIPS and  TCT | Vaccines: DPT-HepB-HiB  • Lavender: 0.5% concentration •Placebo: sweet almond oil 1min before and throughout vaccination | Infants: 2-4m |
| 21 | Viggiano *et al.,* 2021 (42) | Italy – HIC; Vaccination Centres of the Local Health Authority | Cohort study, non-randomized, non-blinded study | •Breastfed •Formula-fed •Held-only controls | Time of measurement: Before,1 and 3 min after  FLACC, NIPS,  TCT, LTC | Vaccines: DTaP/IPV/Hib/HepB,  PCV   - BF and formula-fed held by parent for 2 min before, during and 3 min after, - Control: held by parent, no feeding | Infants: 2-12m and;  Parents |
| 22 | Yadav *et al.,* 2022 (54) | India – LMIC; Department Of Paediatrics, Medical College and Hospital | RCT | •Facilitated rocking movement  •Classical holding group | Time of measurement: 1st min after injection NIPS and TCT | Vaccines: Not reported   - Facilitated rocking after injection - Control: Classical holding position | Infants: <6m and;  HCPs |
| 23 | Yin *et al.,* 2017 (52) | Taiwan – HIC; Well-Baby Clinic, Hospital | Prospective cohort | •Supine position •Upright position | Time of measurement: At 30s and 180s  Modified CRIES, FLACC, irritability, pained facial expression | Vaccines: PCV 13, DPT-HepB-HiB   - Supine (duration not specified) - Upright position 180s after | Infants: 1.5-4m |

LMIC: Lower middle-income country; UMIC: Upper middle-income country; HIC: high income country (1); RCT: randomised controlled trial; BF: breastfeeding; FF: Formula feeding; EMLA: Eutectic mixture of local anaesthesia; FLACC: facial expression, leg movement, activity, crying, and consolability scale; TCT: total crying time; HR: heart rate; SPO2: Peripheral Capillary Oxygen Saturation; NIPS: Neonatal Infant Pain Scale; MBPS: modified behavioural pain scale; MAISD: Measure of Adult and Infant Soothing and Distress; LTC: latency to cry, MFCS: Modified Facial Coding Score; Physician/parent NRS: numeric rating scale; CRIES: Crying, Requires oxygen for saturation >95%, , Increased vital signs (heart rate and blood pressure), Expression (facial), Sleeplessness; aP/Pa: acellular pertussis; D/d: Diphtheria; DF: dtwp administered fist; DPT: Diphtheria, Pertussis, Tetanus; DTaP: Diphtheria, Tetanus, acellular Pertussis; BCG: Bacillus Calmette-Guérin; Hep B/HB: hepatitis B; HF: Hep B administered first; HiB-B: Haemophilus influenzae type B; IPV: Inactivated polio vaccine; MCV-C: Meningococcal C vaccine; MMR: Measles, mumps and rubella; OPV: Oral polio virus vaccine; P/p: pertussis; PCV: Pneumococcal vaccine; RV: Rotavirus; T: Tetanus; Wdtp/wdtp: Whole cell Diphtheria; HCP: Health care professional.
